# Supplementary material
Source: PubMed Central journal article supplement (PMC2836031)
Supplement: supp_C109.057133_jbc.C109.057133-1.pdf [file supp_C109.057133_jbc.C109.057133-1.pdf]

A

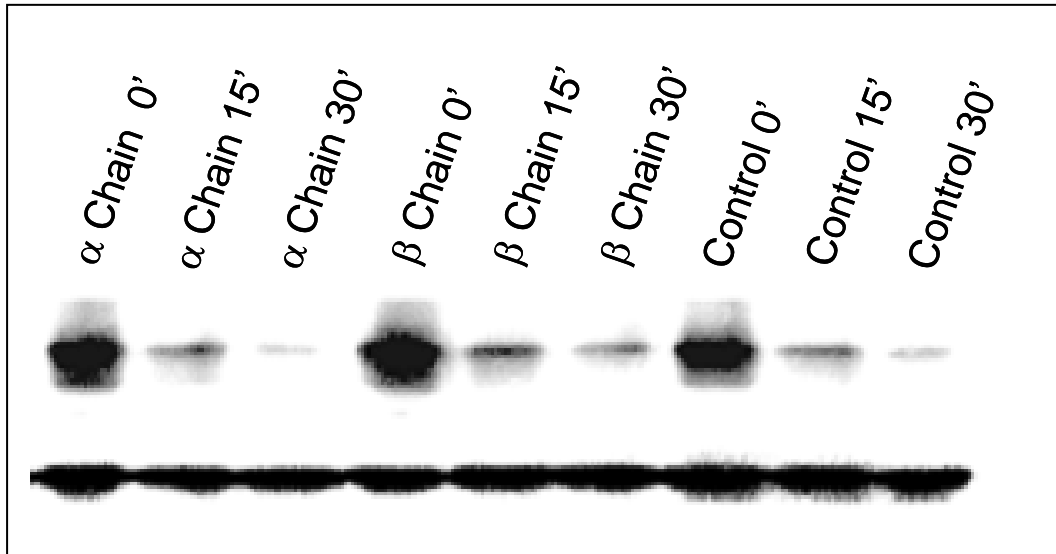

B

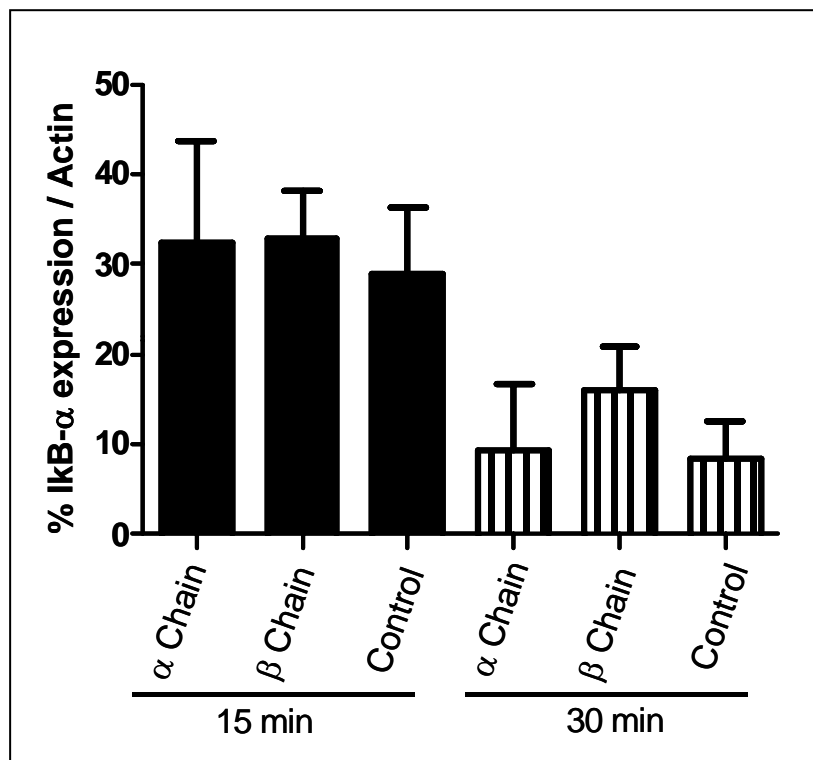

Supplementary data:

FIG. S1. **α and β chain overexpression action on IκB-α expression.** A, Western blotting of IκB-α expression at 0, 15 and 30 minutes after TNF-α (5ng/ml) and cycloheximide (100 μg/ml) stimulation, control correspond to emty pFLAG plasmid. B, Relative expression levels over time determined by densitometry as means ± s.e.m from 3 individual experiments.
